# Supplementary material for: Preparation of CeO2 nanoparticles supported on 1-D silica nanostructures for room temperature selective oxidation of styrene
Source: Royal Society of Chemistry journal article supplement (doi:10.1039/c3ra46179c), 2013-12-10
Supplement: c3ra46179c.pdf [file c3ra46179c.pdf]

## Supporting Information for

# CeO<sub>2</sub> Nanoparticles Supported on 1-D silica Nanostructures for Room Temperature Selective Oxidation of Styrene

Bipul Sarkar, Rajib Kumar Singha, Ritesh Tiwari, Shilpi Ghosh, Shankha Shubhra Acharyya, Chandrashekar Pendem, L. N. Sivakumar Konathala, Rajaram Bal\*

Catalytic Conversion & Processes Division, Indian Institute of Petroleum (Council of Industrial & Scientific Research), Dehradun 248005, India

\*Corresponding author. Tel.: +91 135 2525797; Fax: +91 135 2660202

E-mail addresses: [raja@iip.res.in](mailto:raja@iip.res.in)

Fig. S1

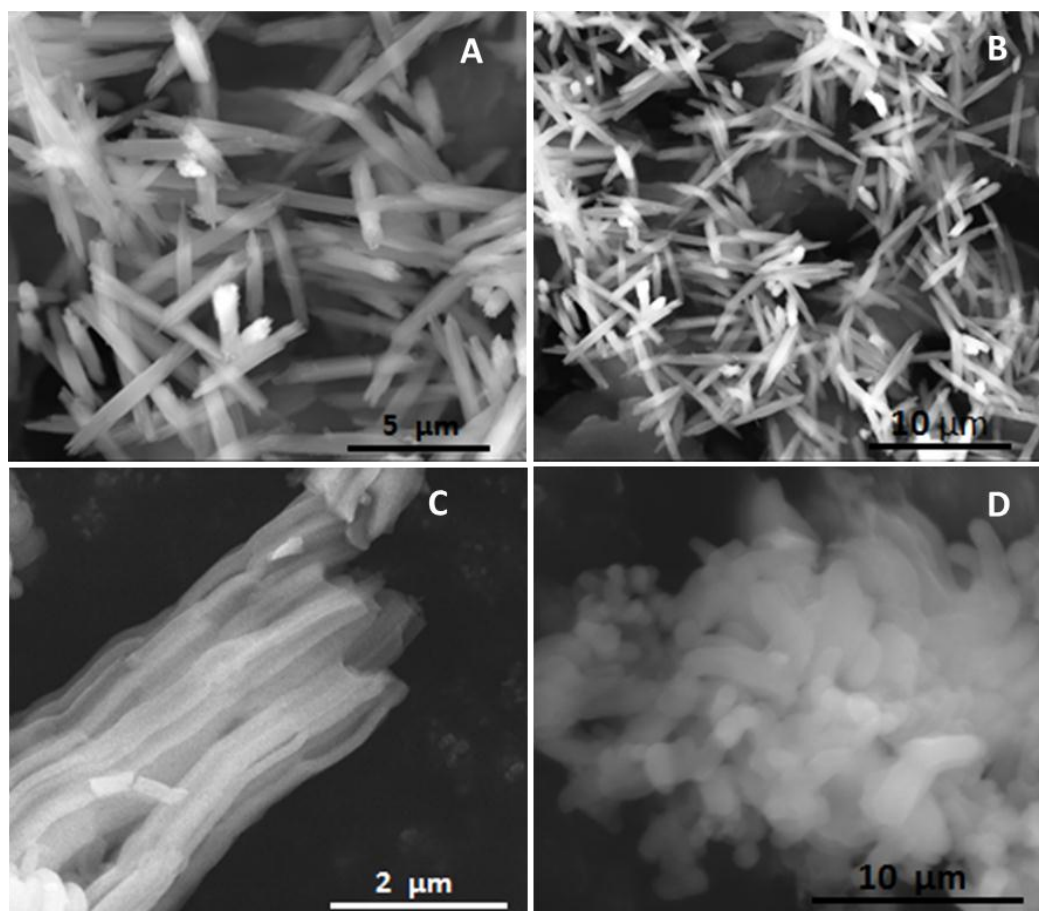

Fig. S1 FE-SEM of the CeO<sub>2</sub>- SiO<sub>2</sub> sample prepared varying Si/Ce ratio.

Fig. S2

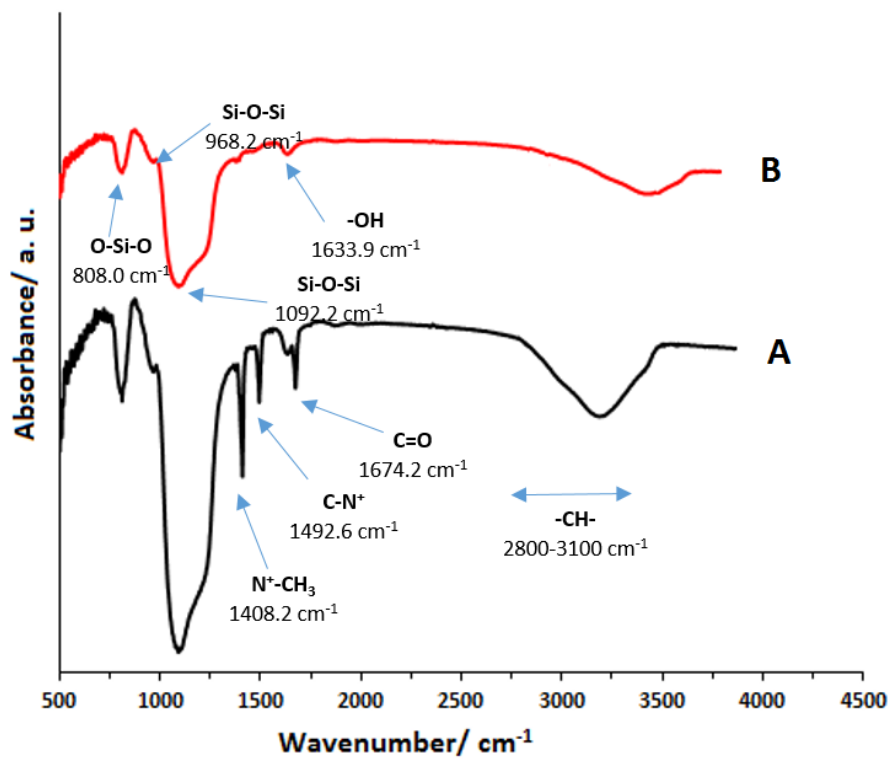

Fig. S2 FTIR spectrum of (A) uncalcined  $\text{CeO}_2\text{-SiO}_2$  and (B) calcined  $\text{CeO}_2\text{-SiO}_2$  nanoarchitecture; Spectrometer was recorded in the range 4000-500  $\text{cm}^{-1}$  at a resolution of 2  $\text{cm}^{-1}$ .

Fig. S3

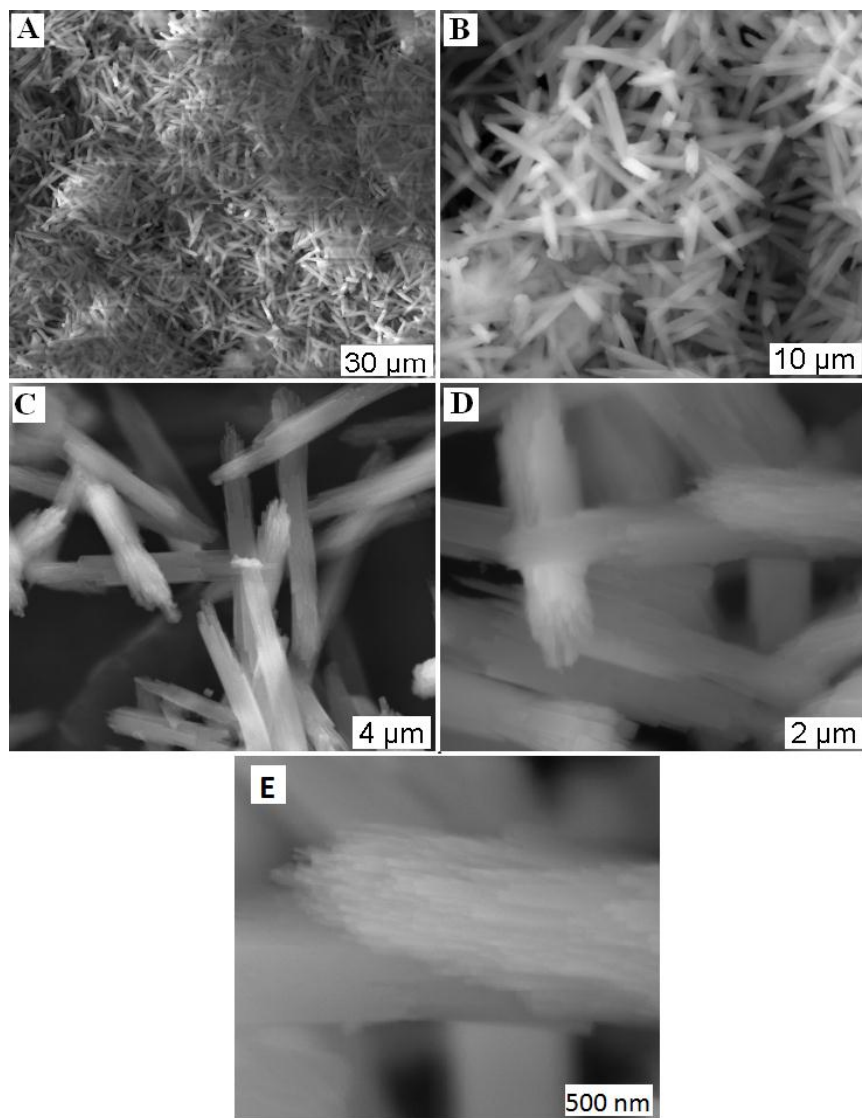

Fig. S3 FE-SEM images of the  $\text{CeO}_2\text{-SiO}_2$

Fig. S4

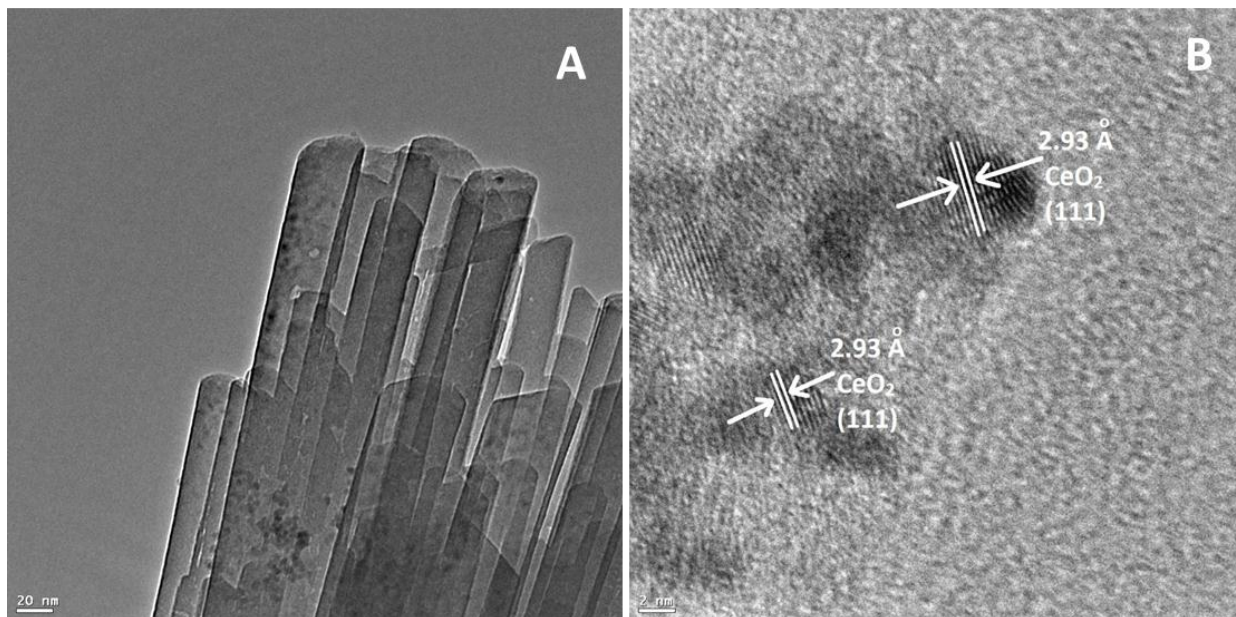

Fig. S4 HR-TEM images of the CeO<sub>2</sub>-SiO<sub>2</sub> catalyst (A) a portion of the CeO<sub>2</sub> supported SiO<sub>2</sub> sheets and (B) showing the lattice fringes of Ce nanoparticle.

Fig. S5

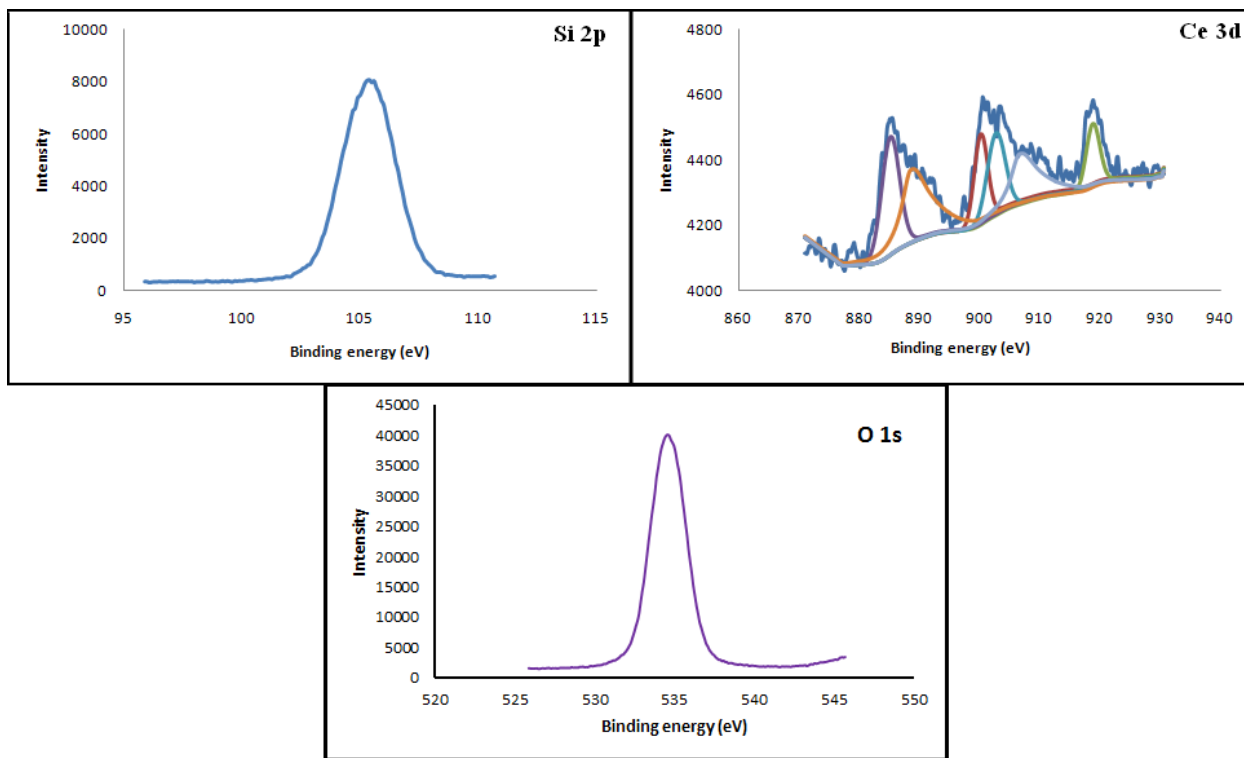

Fig. S5 XPS patterns of prepared nanostructure  $\text{CeO}_2\text{-SiO}_2$  catalyst.

Fig. S6 X-ray diffraction data.

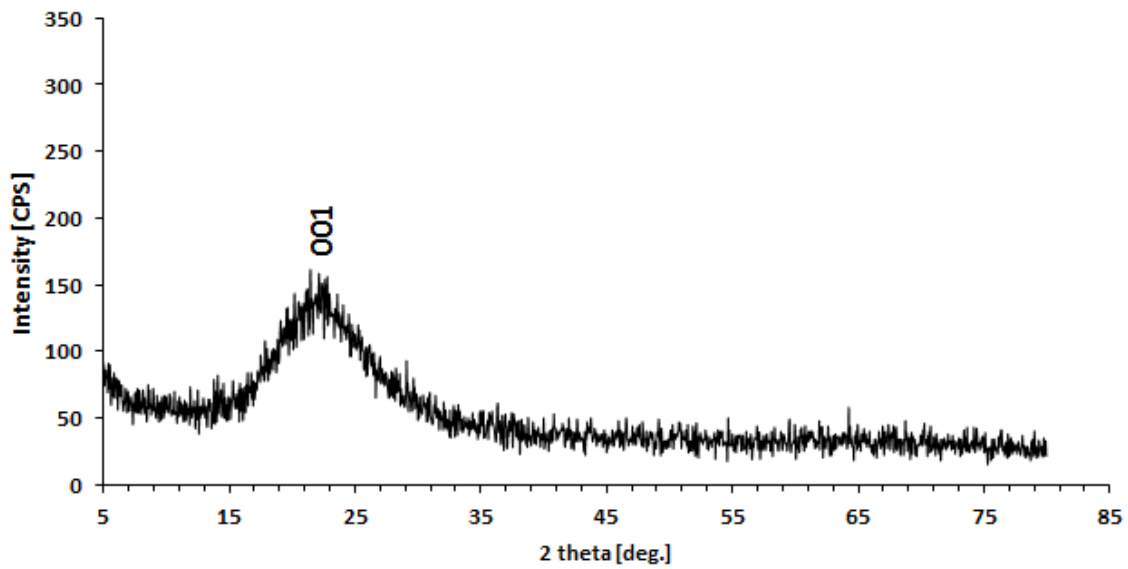

Fig. S6 XRD patterns of prepared nanostructure  $\text{CeO}_2$ - $\text{SiO}_2$

Fig. S7

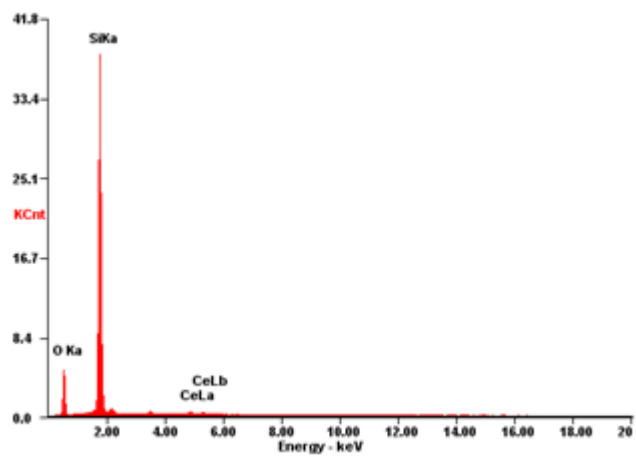

Fig. S7 EDAX spectrum of CeO<sub>2</sub>-SiO<sub>2</sub> nanostructure.



### Material characterization

Powder X-ray diffraction patterns were recorded on a Rigaku-Geigerflex x-ray diffractometer fitted with a Cu K $\alpha$  radiation source. Diffraction patterns in the 5 $^{\circ}$ -80 $^{\circ}$  region were recorded with a 0.04 step size (step time= 4s). FTIR spectra were recorded on a Nicolet 8700 Research FT-IR Spectrometer in the range 4000-500 cm $^{-1}$  at a resolution of 2cm $^{-1}$ . Scanning electron microscopy (SEM) images were taken on a FEI Quanta 200 F, using tungsten filament doped with lanthanumhexaboride (LaB6) as an x-ray source, fitted with an ETD detector with high vacuum mode using secondary electrons and an acceleration tension of 10 or 30 kV. Samples were analyzed by spreading them on a carbon tape. Energy dispersive X-ray spectroscopy (EDX) was used in connection with SEM for the elemental analysis. The elemental mapping was also collected with the same spectrophotometer. TEM images were collected using a JEOL JEM 2100 microscope, and samples were prepared by mounting an ethanol-dispersed sample on a lacey carbon Formvar coated Cu grid and electron diffraction spectra (EDS) was also recorded. Surface area was analyzed at -180 $^{\circ}$ C using a Belsorbmax, BEL, Japan using BET equation. X-Ray photoelectron spectra (XPS) were recorded on a Thermo Scientific K-Alpha X-Ray photoelectron spectrometer and binding energies ( $\pm$ 0.1 eV) were determined with respect to the position C 1s peak at 284.8 eV.

### Oxidation of Styrene

The oxidation of styrene was carried out at room temperature in a 50 ml double necked round bottom flask fitted with a reflux condenser. In each experiment 10 mmol styrene (1g) was taken with 10 ml of acetonitrile as solvent containing 0.01g of prepared CeO $_2$ -SiO $_2$  catalyst. Oxidant (H $_2$ O $_2$ ) 3.5 ml 50% hydrogen peroxide was added slowly. Aliquot were withdrawn after regular interval using a syringe from the reaction mixture for analysis. At the end of the reaction the solid particles (catalyst) were separated by filtration and the products were identified by GC-MS (HP 5890 GC coupled with 5972 MSD) equipped with CP-SIL-5 capillary column. The products were analyzed in an Agilent GC-7890, fitted with a capillary column (HP-5 column, 30m X 0.28mm i.d., 0.25  $\mu$ m film thicknesses).
